# Supplementary material for: The synergistic effect of graphene and polyoxometalates enhanced electrocatalytic activities of Pt-{PEI-GNs/[PMo12O40]3−}n composite films regarding methanol oxidation
Source: Royal Society of Chemistry journal article supplement (doi:10.1039/c2jm35239g), 2012-01-01
Supplement: c2jm35239g.pdf [file c2jm35239g.pdf]

## Electronic Supplementary Information

### **The synergistic effect of graphene and polyoxometalates enhanced electrocatalytic activities of Pt-{PEI-GNs/ [PMo<sub>12</sub>O<sub>40</sub>]<sup>3-</sup>}<sub>n</sub> composite films regarding methanol oxidation**

**Zhongshui Li, Xiaomei Huang, Xiaofeng Zhang, Lian Zhang and Shen Lin<sup>\*ab</sup>**

<sup>a</sup> *College of Chemistry & Chemical Engineering, Fujian Normal University, Fuzhou 350007,*

*China. Tel/Fax: +86-591-22867399; E-mail: shenlin@fjnu.edu.cn*

<sup>b</sup> *Fujian Key Laboratory of Polymer Materials, Fuzhou 350007, Fujian, China.*

*Tel/Fax: +86-591-22867399; E-mail: shenlin@fjnu.edu.cn*

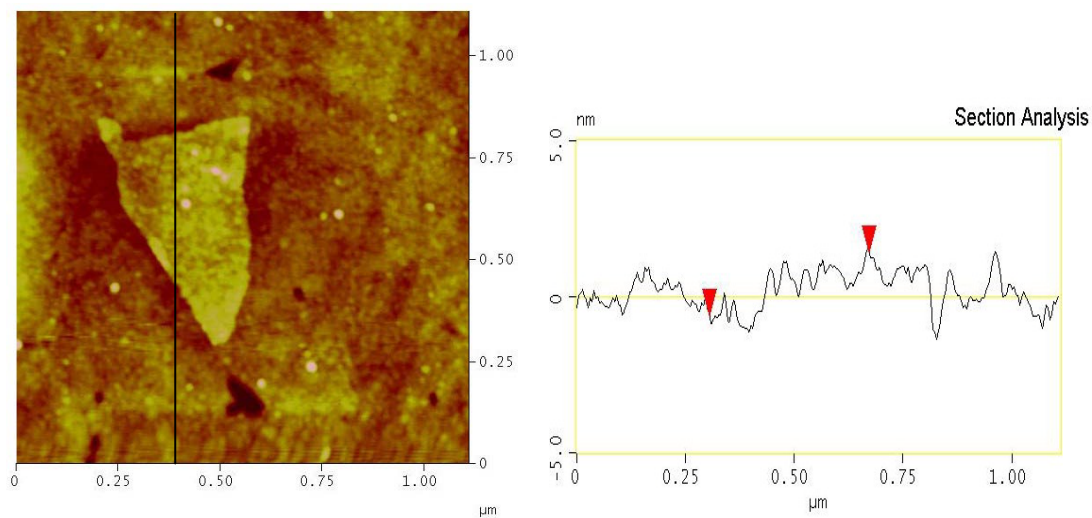

Fig. S1. AFM of PEI-GNs

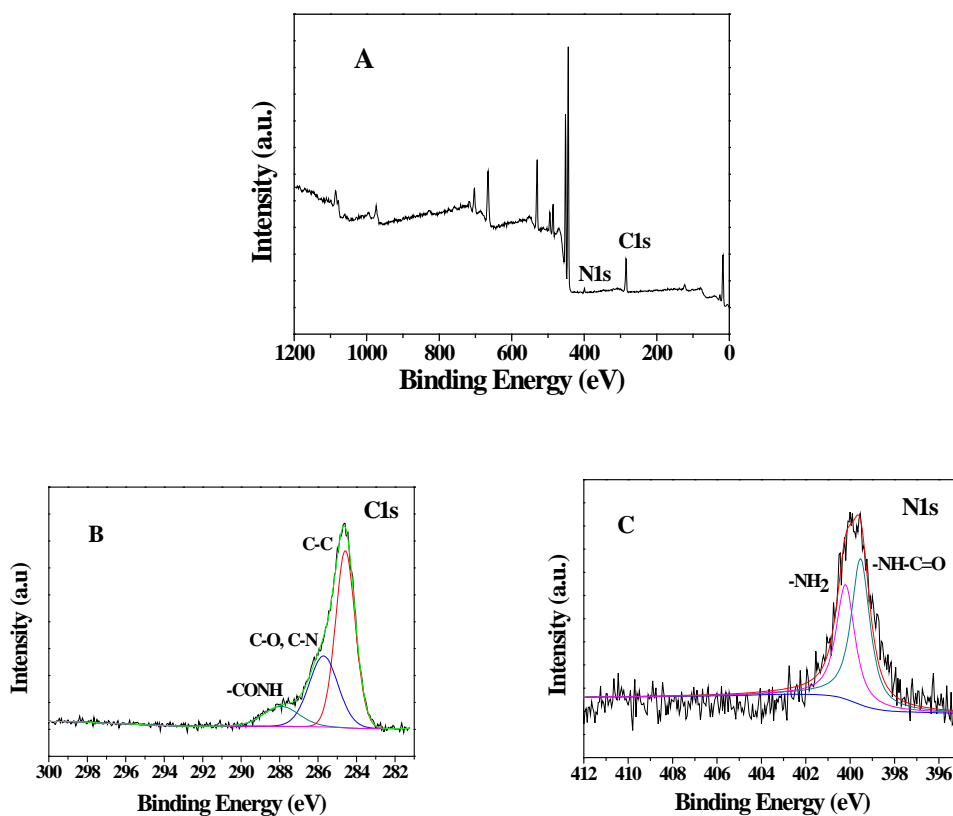

Fig. S2. XPS spectra of PEI-GNs (A) Wide scan survey spectra; (B) XPS C1s spectrum of PEI-GNs; (C) XPS N1s spectrum of PEI-GNs on ITO electrode.

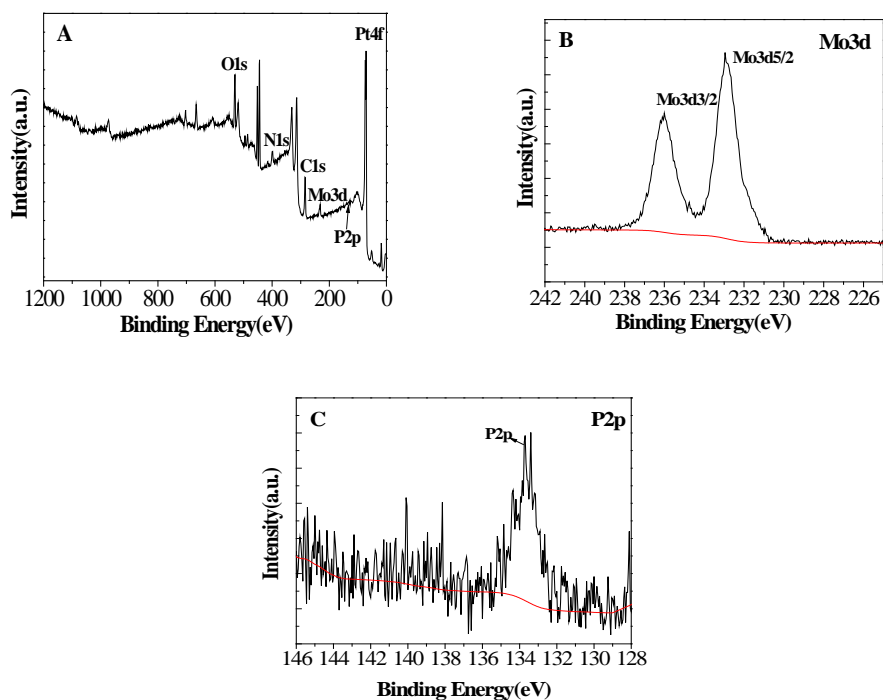

Fig. S3. XPS spectra of (A) Full-spectrum, (B) Mo3d, (C) P2p of Pt-{PEI-GNs/  
PMo<sub>12</sub>}<sub>2</sub> on ITO electrode.

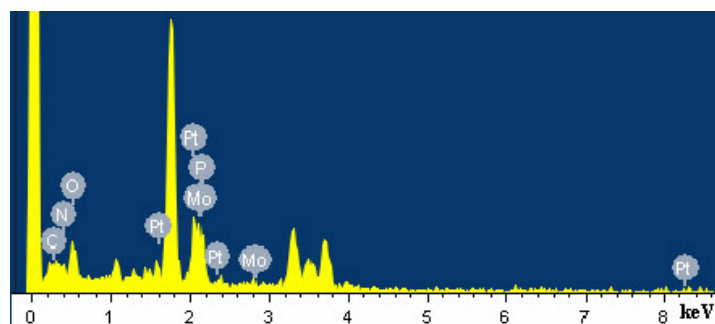

Fig. S4. The typical EDX spectra of Pt-{PEI-GNs/PMo<sub>12</sub>}<sub>2</sub> on ITO electrode.

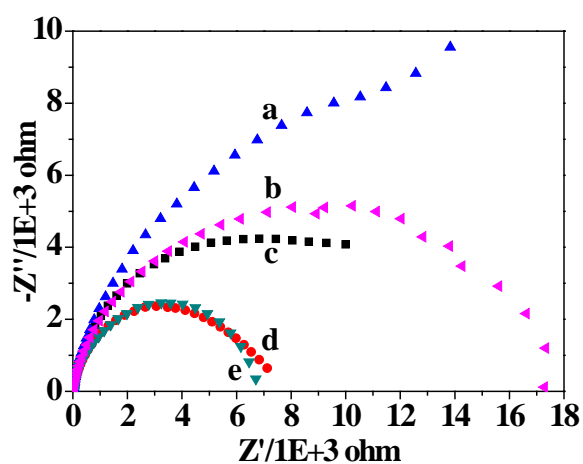

Fig. S5. Nyquist plots of EIS for methanol electrooxidation on (a) Pt/GCE, (b) Pt/{PMo<sub>12</sub>}/GCE, (c) Pt-clusters/{PEI-GNs}/GCE, (d) Pt/{PEI-GNs/PMo<sub>12</sub>}/GCE, (e) Pt-clusters/ {2PEI-GNs/PMo<sub>12</sub>}/GCE in 0.5 M H<sub>2</sub>SO<sub>4</sub> + 1.0 M CH<sub>3</sub>OH solution.
